# Supplementary material
Source: MDPI journal article supplement (https://www.mdpi.com/2075-163X/9/9/503)
Supplement: s1 [file s1]

## Supplementary Materials

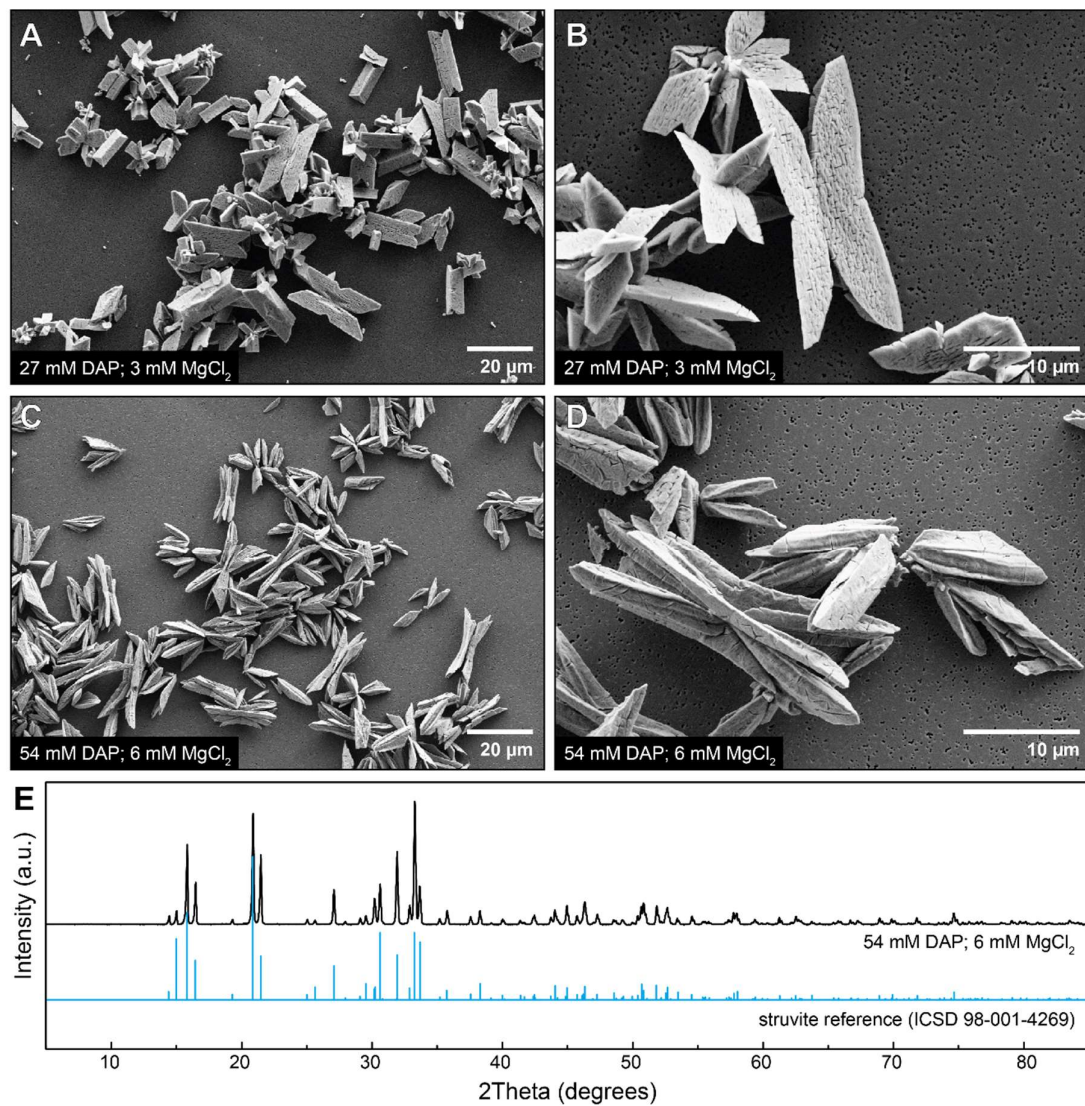

**Figure 1.** SEM image of precipitates from (A,B) a 27 mM DAP + 3 mM  $\text{MgCl}_2$  solution and (C,D) a 54 mM DAP + 6 mM  $\text{MgCl}_2$  solution showing butterfly-shaped crystals of struvite. (E) XRD pattern of the precipitate from a 54 mM DAP + 6 mM  $\text{MgCl}_2$  solution showing that struvite was the only phase present in the reaction product.

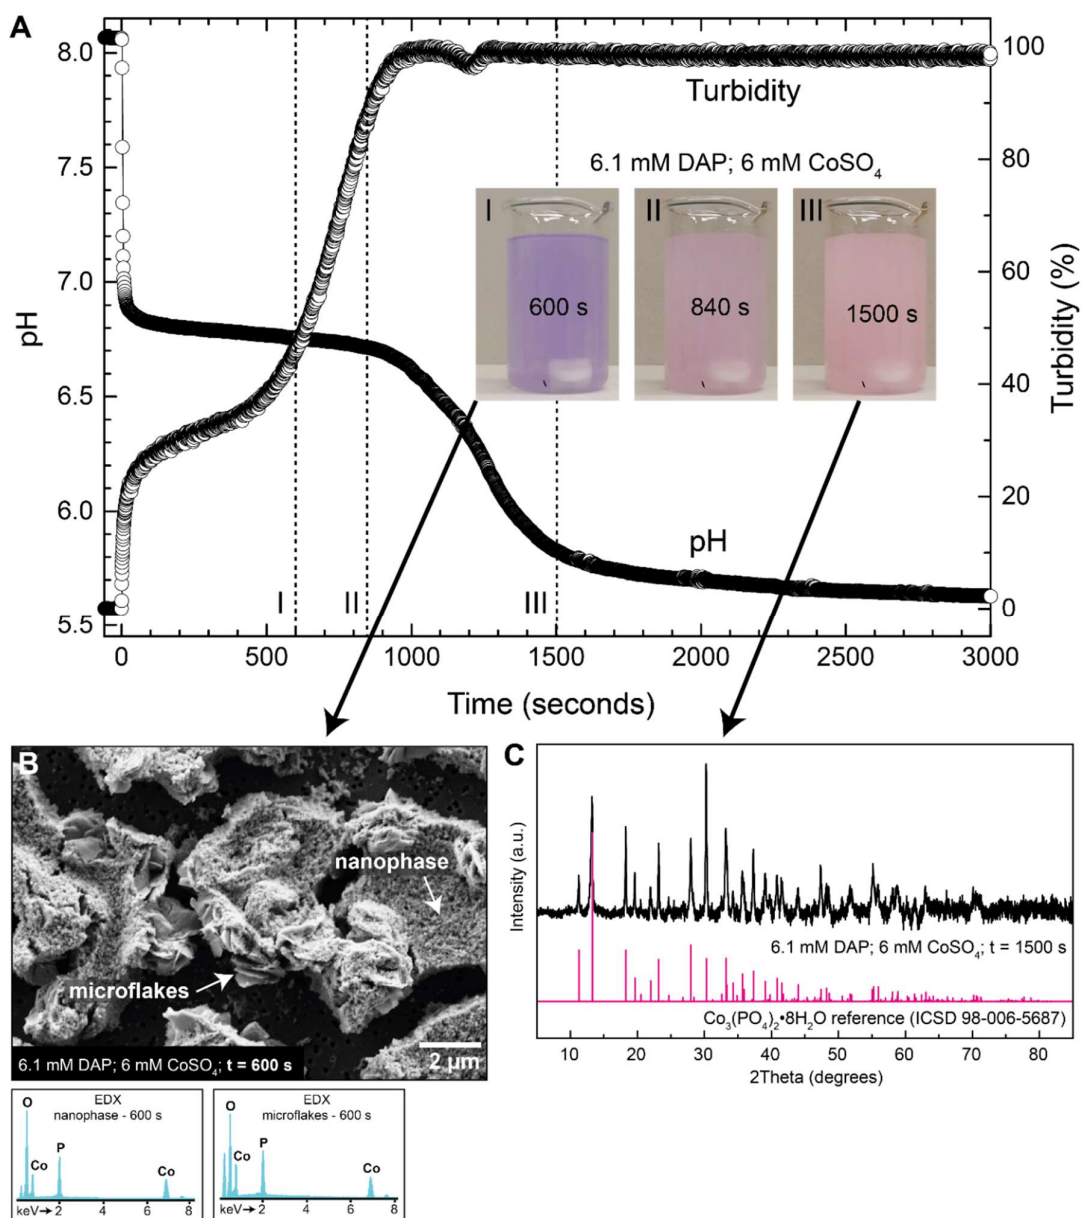

**Figure 2.** (A) The development of pH and turbidity in experiments with 6.1 mM DAP + 6 mM  $\text{CoSO}_4$  over a period of 3000 s. Inset: Time series of photographs of the reaction solution/suspension showing the gradual color change from blue to pink over the course of  $\sim 1500$  s. (B) Top: SEM image of precipitates after a reaction time of 600 s showing the presence of  $\mu\text{m}$ -sized flaky crystals inside a matrix of a nanoparticulate phase. Bottom: EDX analyses of the nanophase and microflakes. (C) XRD pattern of the final reaction product (sampled after 1500 s) matching the reference pattern for cobalt phosphate octahydrate ( $\text{Co}_3(\text{PO}_4)_2 \cdot 8\text{H}_2\text{O}$ ).

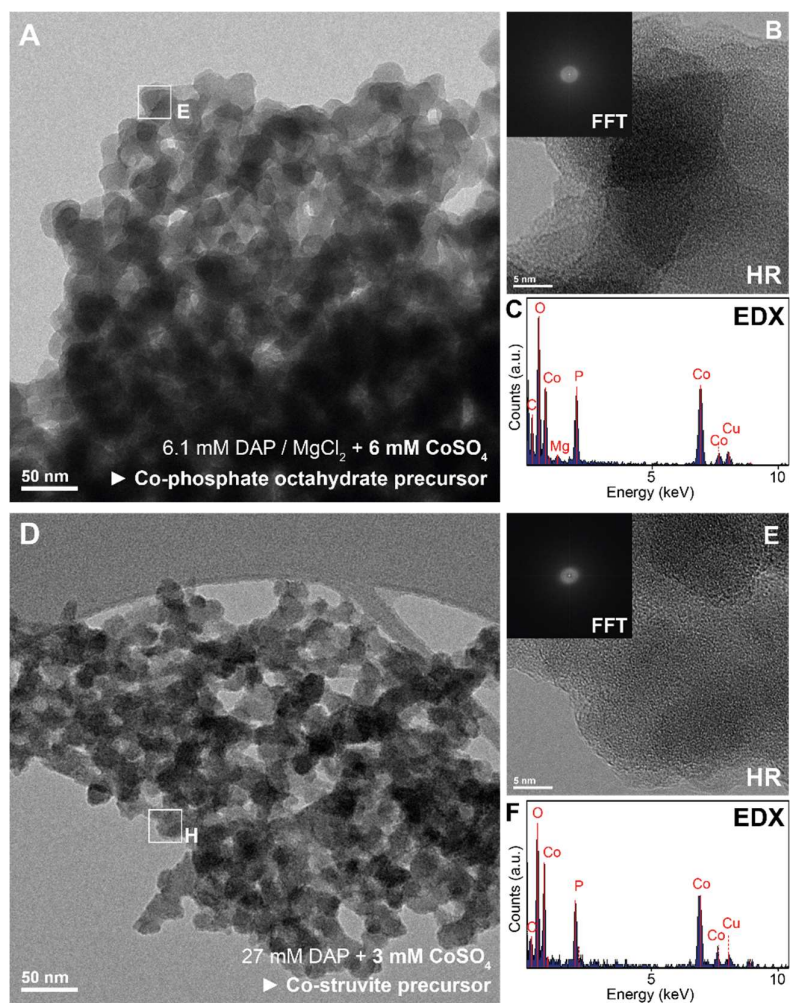

**Figure 3.** Conventional TEM analyses of the nanoparticulate precursors of (A–C) cobalt phosphate octahydrate (precipitated from a 6.1 mM  $\text{MgCl}_2$ -DAP + 6 mM  $\text{CoSO}_4$  solution) and (D–F) Co-struvite (precipitated from a 27 mM DAP + 3 mM  $\text{CoSO}_4$  solution). All particles were sampled after ~10 s of reaction and imaged after drying. Both nanoparticulate precursors were similar in size and shape to the Mg-Co-struvite precursor that was formed in 6.1 mM  $\text{MgCl}_2$ -DAP + 1 mM  $\text{CoSO}_4$  solutions (cf., Figures 6A–C in the main text). The lack of lattice fringes and spots in the high resolution images and the corresponding FFT patterns (B,E) suggests an amorphous structure.
